# Global distribution of earthworm diversity

## One sentence summary (max. 125 characters):

Helen R P Phillips<sup>1,2\*</sup>, Carlos A Guerra<sup>1,2</sup>, Marie L. C. Bartz<sup>3</sup>, Maria J. I. Briones<sup>4</sup>, George Brown<sup>5</sup>, Olga Ferlian<sup>1,2</sup>, Konstantin Gongalsk, Julia Krebs, Alberto Orgiazzi<sup>6</sup>, Benjamin Schwarz, Elizabeth M. Bach<sup>7</sup>, Joanne Bennett<sup>1</sup>, Ulrich Brose<sup>1</sup>, Thibaud Decaëns<sup>8</sup>, Franciska T. De Vries<sup>9</sup> Birgitta König-Ries<sup>10,1</sup>, Patrick Lavelle<sup>11,12,13</sup>, Michel Loreau<sup>14</sup>, Jérôme Mathieu<sup>15,16</sup>, Christian Mulder<sup>17</sup>, Wim van der Putten<sup>18</sup>, Kelly S. Ramirez<sup>19</sup>, Matthias C. Rillig<sup>20</sup>, David Russell<sup>21</sup>, Michiel Rutgers<sup>22</sup>, Madhav P. Thakur<sup>18</sup>, Diana Wall<sup>7,23</sup>, David Wardle<sup>24</sup>

## Data Providers

Erin Cameron<sup>25,26</sup>, Nico Eisenhauer<sup>1,2</sup>

## Institutes:

1. German Centre for Integrative Biodiversity Research (iDiv) Halle-Jena-Leipzig, Deutscher Platz 5e, 04103 Leipzig, Germany
2. Institute of Biology, Leipzig University, Deutscher Platz 5e, 04103 Leipzig, Germany
3. Universidade Positivo, Rua Prof. Pedro Viriato Parigot de Souza, 5300, Curitiba, PR, Brazil, 81280-330
4. Departamento de Ecología y Biología Animal, Universidad de Vigo, 36310 Vigo, Spain
5. Embrapa Forestry, Estrada da Ribeira, km. 111, C.P. 231, Colombo, PR, Brazil, 83411-000
6. European Commission, Joint Research Centre (JRC), Sustainable Resources Directorate, Land Resources Unit, Ispra, Italy

- 25 7. Global Soil Biodiversity Initiative and School of Global Environmental Sustainability, Colorado State  
26 University, Fort Collins, CO 80523 USA
- 27 8. CEFE, UMR 5175, CNRS–Univ Montpellier–Univ Paul–Valéry–EPHE–SupAgro Montpellier–INRA–IRD,  
28 Montpellier, France.
- 29 9. Institute of Biodiversity and Ecosystem Dynamics, University of Amsterdam, The Netherlands
- 30 10. Institute of Computer Science, Friedrich Schiller University Jena, Ernst-Abbe-Platz 2, 07743 Jena, Germany
- 31 11. UPMC Université Paris 06, iEES Paris, 32 Av. Henri Varagnat, 93143 Bondy Cedex, France.
- 32 12. IRD, iEES Paris, Centre IRD Ile de France, 32 Av. Henri Varagnat, 93143 Bondy Cedex, France.
- 33 13. Centro Internacional de Agricultura Tropical (CIAT), TSBF\_LAC, ap aereo 6713, Cali, Colombia
- 34 14. Centre for Biodiversity Theory and Modelling, Theoretical and Experimental Ecology Station, CNRS, 09200  
35 Moulis, France
- 36 15. Sorbonne Université, CNRS, UPEC, Paris 7,
- 37 16. INRA, IRD, Institut d'Ecologie et des Sciences de l'Environnement de Paris, F-75005, Paris, France
- 38 17. Department of Biological, Geological and Environmental Sciences, University of Catania, Via Androne 81,  
39 95124 Catania, Italy
- 40 18. Department of Terrestrial Ecology, Netherlands Institute of Ecology (NIOO-KNAW), 6700 AB Wageningen,  
41 The Netherlands
- 42 19. Netherlands Institute of Ecology, Terrestrial Ecology, 6708PB Wageningen, The Netherlands
- 43 20. Freie Universität Berlin, Institute of Biology, 14195 Berlin, Germany
- 44 21. Senckenberg Museum for Natural History Görlitz, Department of Soil Zoology, 02826 Görlitz, Germany
- 45 22. National Institute for Public Health and the Environment, Bilthoven, The Netherlands
- 46 23. Department of Biology, Colorado State University, Fort Collins, CO, USA
- 47 24. Asian School of the Environment, Nanyang Technological University, Singapore 639798
- 48 25. Faculty of Biological and Environmental Sciences, Post Office Box 65, FI 00014, University of Helsinki,  
49 Finland
- 50 26. Department of Environmental Science, Saint Mary's University, Halifax, Nova Scotia, Canada

51

52 \*Corresponding author: helen.phillips@idiv.de

## 53 Abstract (max. 125 words)

54 Soil organisms are crucial for ecosystem services that support human life. However, little is  
55 known about the distribution, diversity and threats facing them. Here, we compiled a global  
56 dataset of sampled earthworm communities from over 7000 sites in 56 countries to predict  
57 patterns in earthworm diversity, abundance, and biomass. Further, we identify the  
58 environmental drivers shaping these patterns. Local species richness and abundance typically  
59 peaked at higher latitudes, while biomass peaked in the tropics, patterns opposite to that  
60 observed in many aboveground taxa. But similar to many aboveground taxa, climate variables  
61 were more important in shaping earthworm communities than variables relating to soil or habitat  
62 cover. These findings highlight that, while the environmental drivers are similar, conservation  
63 strategies to conserve aboveground biodiversity might not be appropriate for earthworm  
64 diversity.

## 65 Main Text

66 Despite repeated calls for large-scale biogeographic studies of soil organisms (1–3), global  
67 biodiversity patterns remain relatively unknown, with most efforts focused on soil microbes (4–  
68 6), the smallest of the soil organisms. Consequently, the drivers of soil biodiversity, particularly  
69 soil fauna, remain unknown at global scales. Nevertheless, soils harbour high biodiversity (7–  
70 11), and are responsible for a large number of ecosystem functions and services that we rely  
71 upon for our well-being (9, 10, 12, 13).

72

73 Here we analyse global patterns in diversity, abundance and biomass of earthworms (hereafter  
74 ‘community metrics’). Earthworms are considered ecosystem engineers (14) in many habitats,  
75 and contribute to soil quality (e.g., nutrient availability through decomposition 15–17). They also  
76 directly provide a variety of vital ecosystem functions and services (18). Whereas most

77 biodiversity-ecosystem functioning studies focus on species richness as a diversity measure  
78 (19–21), the provisioning of ecosystem functions by earthworms is likely to vary depending on  
79 abundance (22), biomass (23–25), and ecological group of the earthworm species (24, 26, 27;  
80 see Supplementary Materials and Methods). Consequently, understanding global patterns in  
81 community metrics for earthworms is critical.

82  
83 Our ecological understanding of global biodiversity patterns (e.g., latitudinal diversity gradients  
84 28, 29) are largely based on the distribution of aboveground taxa only. For many aboveground  
85 taxa, variables relating to climate (30–33) or energy (e.g., primary productivity 34;  
86 evapotranspiration 35, 36) are often the most important predictors of diversity across large  
87 scales. At large scales, climatic drivers also shape belowground communities (5, 37–41), but  
88 the response to these drivers in belowground communities may differ from those seen  
89 aboveground (5, 42, 43). For example, mean annual temperature positively correlates  
90 aboveground diversity (44), but negatively correlates with the diversity of many classes of fungi  
91 (5), likely due to the optimum temperature of the latter being exceeded (45).

92  
93 From small scale field studies we know that soil properties such as pH and soil carbon will  
94 influence earthworm diversity (40, 46, 47). For example, lower pH values constrain the diversity  
95 of earthworms by reducing calcium availability (48), and soil carbon provides resources that  
96 sustain diversity (46). Alongside the many interacting soil properties (40), there are a variety of  
97 other drivers can shape earthworm diversity, such as climate and habitat cover (46, 49, 50).  
98 However, to date, no single framework focused on soil fauna has integrated a comprehensive  
99 set of environmental drivers to identify the most important ones.

100

101 As many soil organisms have shown global diversity patterns that differ from aboveground  
102 organisms (5, 42, 43, 51), we anticipate that earthworm community metrics (particularly

103 diversity) will not follow global patterns seen aboveground. This would be consistent with  
104 previous studies at smaller scales, which have shown that species richness of earthworms  
105 increases with latitude (40, 50). Because studies have shown that local earthworm communities  
106 are highly influenced by soil properties, we furthermore expect soil properties (e.g., pH and soil  
107 organic carbon) to be key environmental drivers of earthworm communities.

108

109 We collated 181 earthworm diversity datasets from the literature and unpublished field studies  
110 (162 and 19, respectively) to create a dataset spanning 56 countries (all continents except  
111 Antarctica) and 7048 sites (Figure 1a). We used this raw data to explore key characteristics of  
112 earthworm communities (species richness, abundance and biomass), and determine the  
113 environmental drivers that shape earthworm biodiversity. We then used the relationships  
114 between earthworm community metrics and environmental drivers to predict local earthworm  
115 communities across the globe. Here, we present the first global maps describing earthworm  
116 biodiversity, distilled into three earthworm community metrics: diversity, abundance, and  
117 biomass.

118

119 Three mixed effects models were constructed for each of the three community metrics; species  
120 richness (calculated within a site,  $\sim 1\text{m}^2$ ), abundance per  $\text{m}^2$ , and biomass per  $\text{m}^2$ . Each model  
121 contained 12 environmental variables as main effects (Supplementary Table 2) which were  
122 grouped into six themes; 'soil', 'precipitation', 'temperature', 'water retention', 'habitat cover' and  
123 'elevation' (see Supplementary Materials and Methods). Within each theme, each model  
124 contained interactions between the variables. Following model simplification, all models retained  
125 most of the original variables, but some interactions were removed (Supplementary Table 3). All  
126 models performed well in cross-validation (Supplementary Figure 2) with relatively high  $R^2$   
127 values (Supplementary Table 4 a and c, see Supplementary Material for further details).

128

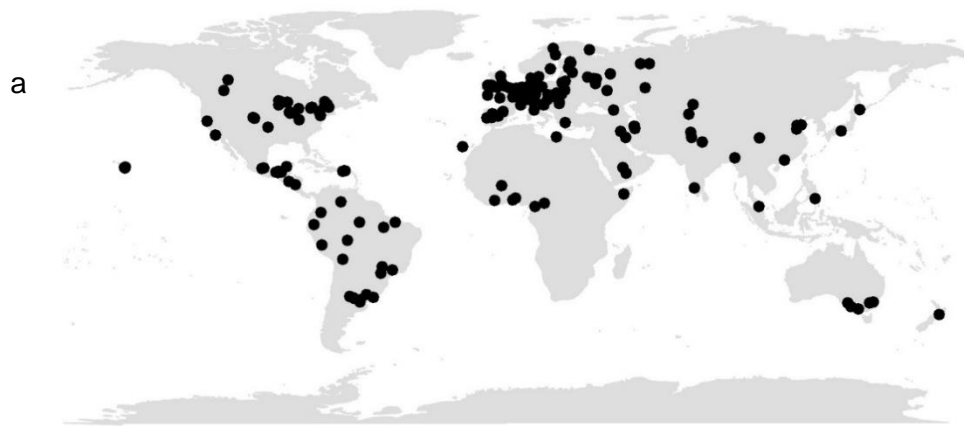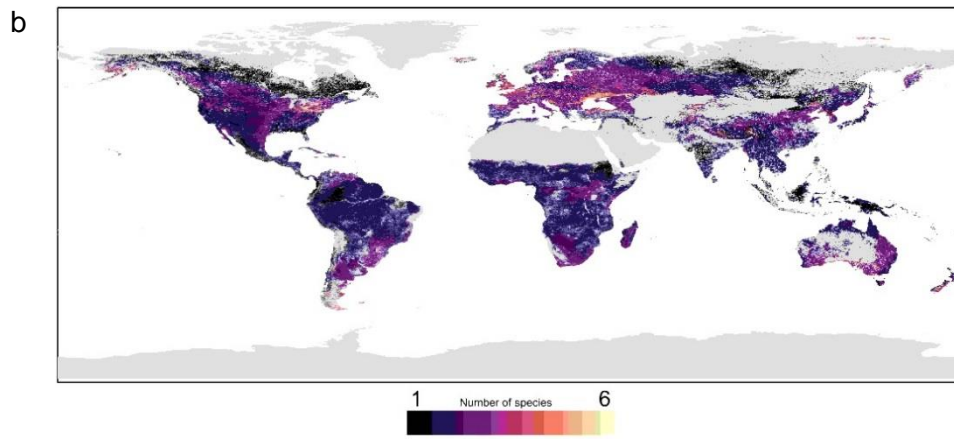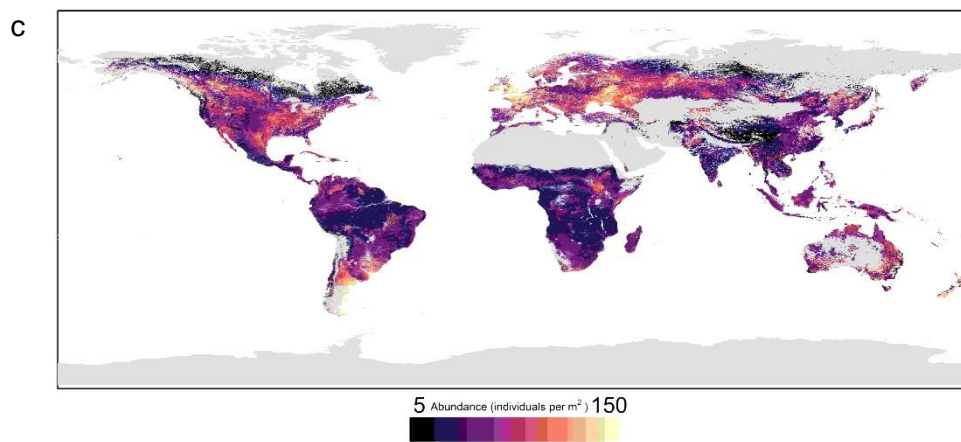

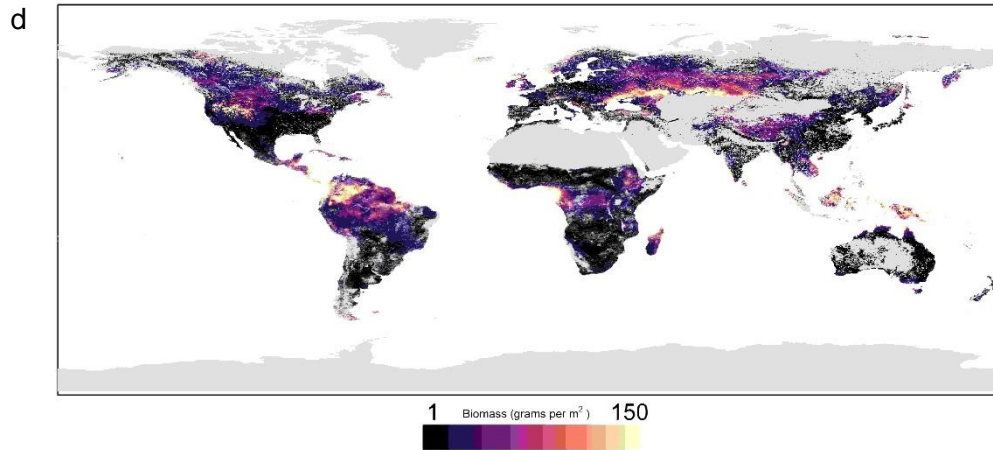

Figure 1 (a) Map of the distribution of data, showing any record that was used in at least one of the three models (species richness, abundance, and biomass). Each black dot represents the centre of a 'study' (i.e., a set of data with consistent methodology, see Supplementary Materials and Methods). In total, 229 studies were included (from 181 datasets), which equated to 7048 sites across 56 countries. (b-d): The globally predicted values from the three biodiversity models, species richness (within site,  $\sim 1\text{m}^2$ ; panel b), abundance (panel c; individuals per  $\text{m}^2$ ), and biomass (panel d; grams per  $\text{m}^2$ ). Areas of high diversity are shown in yellow colours, and areas of low diversity are shown in dark purple colours. Grey areas are habitat cover categories which lacked samples of earthworm communities, thus lack predictions. To prevent outliers skewing the visualization of results, the colour of maps were curtailed at the extreme low and high values. Curtailing was based on where the majority of values laid. Thus, values lower or higher than that number marked on the scale are coloured the same but may represent a large range of values.

129

130 Predicting across global environmental data layers, local diversity of earthworms was estimated  
131 to range between 1 and 4 species across most of the terrestrial globe (Figure 1b) (mean: 1.98  
132 species; SD: 0.55). These values are in line with previous suggestions (47). The lowest values  
133 of species richness occurred across the boreal/subarctic regions, which was expected based on  
134 aboveground biodiversity patterns. However, low diversity also occurred in subtropical and  
135 tropical areas, such as India and Indonesia, in contrast with commonly observed  
136 macroecological patterns. This low earthworm diversity could be due to these regions typically  
137 being outside of the optimal temperature range (12-20°C 52) for earthworms. Areas of high local

138 species richness were at mid-latitudes, such as the southern tip of South America, and the  
139 southern regions of Australia and New Zealand. Europe (particularly north of the Black Sea) and  
140 northeastern USA also had particularly high local species richness. While this pattern contrasts  
141 with the latitudinal diversity patterns found in many aboveground organisms (28, 29, 53), it is  
142 consistent with patterns found in some belowground organisms (ectomycorrhizal fungi 5,  
143 bacteria 41, nematodes 54, 55), but not all (arbuscular mycorrhizal fungus 39, oribatid mites  
144 56). The mismatch between above- and belowground biodiversity has been predicted (42, 51,  
145 57). This work highlights the fact that it is important that soil organism diversity patterns are  
146 examined in concert with those of aboveground taxa if we want to fully understand large-scale  
147 patterns of biodiversity and their underlying drivers (43, 58).

148

149 However, the patterns seen could be as a result of past climates, in particular glaciation in the  
150 last ice age. With the expectation that regions in the mid- to high latitudes that were previously  
151 glaciated would be re-colonised by earthworm species with high dispersal capabilities and large  
152 geographic ranges (50). Thus mid-latitude communities would have high local diversity but  
153 minimal beta-diversity, and the opposite would be true in the tropical regions. When the number  
154 of unique species within each 5 degree latitude band was calculated (i.e., regional richness,  
155 Figure 2a) there was no evidence of a latitudinal diversity gradient once sampling effects have  
156 been accounted for (Figure 2b). This highlights that even with relatively low sampling effort in  
157 the tropics (Figure 2a), endemism of earthworms (59) and beta diversity within the region (i.e.,  
158 across the sites; 50, 60) must be considerably higher than within the well-sampled temperate  
159 region.

160

161 Across the globe, predicted total abundance of the local community of earthworms typically  
162 ranged between 5 and 150 individuals per m<sup>2</sup>, in line with estimates from Curry (46) (Figure 1c;  
163 mean: 57.00 individuals per m<sup>2</sup>; SD: 43.59). There was a slight tendency for areas of higher



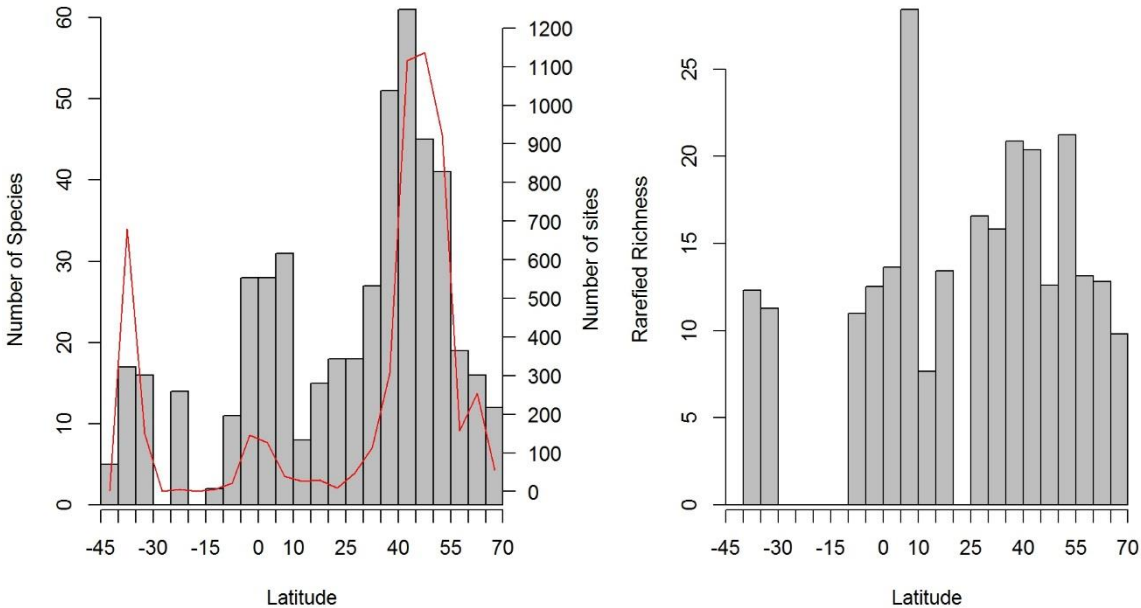

Figure 2 (a) The number of unique species within each 5 degree latitude band (grey bars) and the number of sampled sites within the same latitude band (red line). (b) Sampled-based rarefied species richness within each 5 degree latitude band. Latitude bands with less than 22 sites were not included in the analysis.

164

165 community abundance to not be in the tropics, but in temperate areas such as Europe  
166 (particularly the UK, France and Ukraine), New Zealand, and part of the Pampas and  
167 surrounding region (South America). Lower community abundance occurred in many of the  
168 tropical and sub-tropical regions, such as Brazil, central Africa, and parts of China. In regions of  
169 lower earthworm abundance the relationship between community abundance and ecosystem  
170 function (61–63) implies a lower provision of the ecosystem services performed by these  
171 organisms. Further research is needed to disentangle whether these functions are in fact  
172 reduced or whether they are carried out by other soil taxa (64).

173

174 The predicted total biomass of the local earthworm community across the globe typically ranged  
175 between 1 g and 150 g per m<sup>2</sup> (Figure 1d; mean: 380.86g; SD: 47684.3, see Supplementary  
176 Materials and Methods for discussion in regards to extreme values). The areas of high  
177 earthworm biomass were spread across the globe, but concentrated in the tropics (particularly

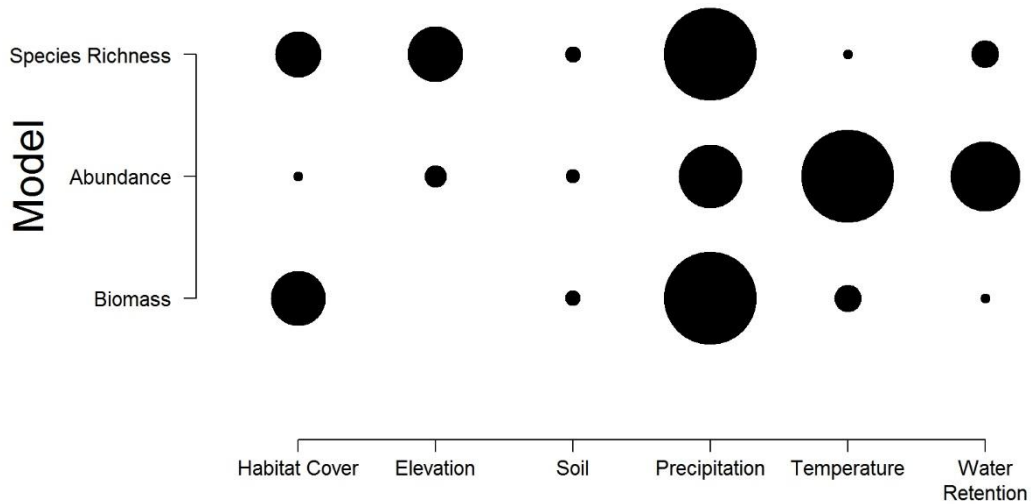

Figure 3: Based on RandomForest models, the importance of the six variable themes from the three biodiversity models. Each row shows the results of each model (top: species richness, middle: abundance, bottom: biomass). Each column represents a theme of variables that was present in the simplified biodiversity model. In the main plot area, the most important variable group has the largest circle. Within each row, the circle size of the other variable themes are scaled in size depending on the relative change in importance. Thus, the circle size should only be compared within a row. Variable theme importance, calculated from the node impurity, was the weighted average of all variables within each theme, following simplification.

178 Indonesia, parts of Coastal West Africa, Southern Central America, much of Colombia and  
179 Western Venezuela), some regions of North America and the Eurasian Steppe. In some  
180 regions this was almost the inverse of the abundance patterns (Figure 1c), thus these results  
181 may relate to the fact that earthworms decrease in body size towards the poles (65, 66), unlike  
182 other animals (e.g., birds and mammals 67). This decrease in earthworm body size might be  
183 due to smaller-bodied earthworms with greater dispersal capabilities recolonising northern  
184 regions following deglaciation post-ice age (50). In northern North America, where there are no  
185 native earthworms (68, 69), high density and, in some regions, high biomass of earthworms  
186 likely reflects the earthworm invasion of these regions. The invasive smaller European  
187 earthworm species likely encounter an enormous unused resource pool, which leads to

188 exceptionally high population sizes (70). In contrast, in Brazil, where we had a relatively higher  
189 sampling density (Figure 1a), patterns of abundance and biomass corresponded with the  
190 earthworm species that have been documented there. There are a number of giant earthworm  
191 species (71) within Brazil (and other countries in the tropics, such as Indonesia, where a similar  
192 pattern is shown). These giant earthworms normally occur at low densities and low species  
193 richness (72), causing the patterns observed of high biomass but low abundance.

194

195 For all three of the community metric models (species richness, abundance, and biomass),  
196 climatic variables were the most important drivers (the 'temperature' theme being the most  
197 important for both species richness and total biomass models, and 'precipitation' theme for the  
198 community abundance model; Figure 3). The importance of climatic variables is consistent with  
199 many aboveground taxa (e.g., plants 31, reptiles/amphibians/mammals 34) and belowground  
200 taxa (bacteria and fungi 5, 41, nematodes 55, springtails 73) when examined at large scales.  
201 This suggests that climate related methods and data, which are typically used for the estimation  
202 of aboveground biodiversity by macroecologists, may also be suitable for estimating earthworm  
203 communities. However, the strong link between climatic variables and earthworm community  
204 metrics is cause for concern, as climate has been and will continue to change due to  
205 anthropogenic activities over the coming decades (74). Our findings further highlight that  
206 changes in temperature and precipitation are likely to influence earthworm diversity (75–77)  
207 and their distributions (40, 78). The expansion or shifts in distributions may be particularly  
208 problematic in the case of invasive earthworms, such as in North America (68, 79). However, a  
209 change in climate will most likely affect abundance and biomass of the earthworm communities  
210 before diversity, as shifts in the latter depend upon dispersal capabilities, which are relatively  
211 low in earthworms: 10m per year (80) compared to 600m per year for the average terrestrial  
212 organism (81). This underscores the need to study earthworms in terms of multiple community  
213 metrics in order to accurately assess responses of communities to climate change.

214

215 Habitat cover and soil properties still influenced the earthworm community (Supplementary  
216 Figure 3 a and b) and in the case of habitat cover, especially the community structure in relation  
217 to the three ecological groups (epigeic, endogeics and anecics, see Supplementary Material  
218 and Methods and Supplementary Figure 4). Across larger scales, climate will influence both the  
219 habitat cover and the soil properties, all of which will affect earthworm communities. Being able  
220 to account for this indirect effect with appropriate methods and data may alter the perceived  
221 importance of soil properties and habitat cover (e.g., with pathway analysis 33). In addition, for  
222 soil properties, the mismatch in scale between community metrics and soil properties taken from  
223 global layers (for sites where sampled soil properties were missing; see supplementary methods  
224 and materials) could also reduce the apparent importance of the theme.

225

226 By compiling a global dataset of earthworm communities we show, for the first time, the global  
227 distribution of earthworm diversity, abundance and biomass, and identify key environmental  
228 drivers responsible for these patterns. Our findings suggest that climate change might have  
229 significant and serious effects on earthworm communities and the functions they provide.  
230 Despite earthworm communities being driven by similar environmental drivers as aboveground  
231 communities (31, 33), this relationship results in different patterns of diversity. We highlight the  
232 need to integrate belowground organisms into the global biodiversity paradigm to fully  
233 understand global patterns of biodiversity. Our study creates an avenue for future research:  
234 given that climate was the most important predictor of earthworm communities, it is possible for  
235 ecologists who have previously focused on modelling aboveground diversity to use similar  
236 methods belowground. By modelling both realms, aboveground/belowground comparisons are  
237 possible, potentially allowing a clearer view of the biodiversity distribution of whole ecosystems.

238

## 239 Acknowledgments

240 Funding: ML was supported by the TULIP Laboratory of Excellence (ANR-10-LABX-41). KSR

241 was supported by (ERD-ADV grant 323020 to WvdP).

242 sDIV

243

244 Author contributions:

245 Competing interests:

246 Data and materials availability:

247

## 248 References

- 249 1. L. Brussaard, Biodiversity and ecosystem functioning in soil. *Ambio A J. Hum. Environ.*  
250 **26**, 563–570 (1997).
- 251 2. J. Rusek, Biodiversity of Collembola and their functional role in the ecosystem. *Biodivers.*  
252 *Conserv.* **7**, 1207–1219 (1998).
- 253 3. N. Eisenhauer *et al.*, Priorities for research in soil ecology. *Pedobiologia.* **63**, 1–7 (2017).
- 254 4. K. S. Ramirez *et al.*, Detecting macroecological patterns in bacterial communities across  
255 independent studies of global soils. *Nat. Microbiol.* **3**, 189–196 (2018).
- 256 5. L. Tedersoo *et al.*, Global diversity and geography of soil fungi. *Science.* **346**, 1256688–  
257 1256688 (2014).
- 258 6. M. Delgado-Baquerizo *et al.*, A global atlas of the dominant bacteria found in soil.  
259 *Science.* **359**, 320–325 (2018).
- 260 7. P. S. Giller, The diversity of soil communities, the poor man’s tropical rainforest?  
261 *Biodivers. Conserv.* **5**, 135–168 (1996).
- 262 8. T. Bongers, H. Ferris, Nematode community structure as a bioindicator in environmental  
263 monitoring. *Trends Ecol. Evol.* **14**, 224–228 (1999).
- 264 9. T. Decaëns, J. J. Jiménez, C. Gioia, G. J. Measey, P. Lavelle, The values of soil animals  
265 for conservation biology. *Eur. J. Soil Biol.* **42**, S23–S38 (2006).
- 266 10. R. D. Bardgett, W. H. van der Putten, Belowground biodiversity and ecosystem  
267 functioning. *Nat.* **515**, **505**, 505–511 (2014).
- 268 11. W. B. Whitman, D. C. Coleman, W. J. Wiebe, Prokaryotes: The unseen majority. *Proc.*  
269 *Natl. Acad. Sci.* **95**, 6578–6583 (1998).
- 270 12. D. H. Wall, U. N. Nielsen, J. Six, Perspective Soil biodiversity and human health. *Nature.*  
271 **528**, 69–76 (2015).
- 272 13. A. Orgiazzi *et al.*, *Global Soil Biodiversity Atlas* (2016).
- 273 14. P. Lavelle *et al.*, in *Earthworm Ecology, Second Edition*, C. Edwards, Ed. (CRC Press,  
274 2004).
- 275 15. G. G. Brown, P. F. Hendrix, M. H. Beare, Influence of earthworms (*Lumbricus rubellus*)

- 276 on sorghum litter processing and nitrogen mineralisation in two Ultisols. *Acta Zool. Fenn.*  
277 **196**, 55–59 (1995).
- 278 16. J. Seeber, G. U. H. Seeber, R. Langel, S. Scheu, E. Meyer, The effect of macro-  
279 invertebrates and plant litter of different quality on the release of N from litter to plant on  
280 alpine pastureland. *Biol. Fertil. Soils.* **44**, 783–790 (2008).
- 281 17. C. A. Edwards, *Earthworm ecology* (2004).
- 282 18. M. Blouin *et al.*, A review of earthworm impact on soil function and ecosystem services.  
283 *Eur. J. Soil Sci.* **64**, 161–182 (2013).
- 284 19. P. Balvanera *et al.*, Quantifying the evidence for biodiversity effects on ecosystem  
285 functioning and services. *Ecol. Lett.* **9**, 1146–1156 (2006).
- 286 20. D. U. Hooper *et al.*, A global synthesis reveals biodiversity loss as a major driver of  
287 ecosystem change. *Nature.* **486**, 105–108 (2012).
- 288 21. D. Tilman, F. Isbell, J. M. Cowles, Biodiversity and Ecosystem Functioning. *Annu. Rev.*  
289 *Ecol. Evol. Syst.* **45**, 471–493 (2014).
- 290 22. J. W. van Groenigen *et al.*, Earthworms increase plant production: a meta-analysis. *Sci.*  
291 *Rep.* **4**, 6365 (2014).
- 292 23. C. Sheehan, L. Kirwan, J. Connolly, T. Bolger, The effects of earthworm functional group  
293 diversity on nitrogen dynamics in soils. *Soil Biol. Biochem.* **38**, 2629–2636 (2006).
- 294 24. D. Craven *et al.*, The unseen invaders: introduced earthworms as drivers of change in  
295 plant communities in North American forests (a meta-analysis). *Glob. Chang. Biol.* **23**,  
296 1065–1074 (2017).
- 297 25. F. Schwarzmüller, N. Eisenhauer, U. Brose, “Trophic whales” as biotic buffers: Weak  
298 interactions stabilize ecosystems against nutrient enrichment. *J. Anim. Ecol.* **84**, 680–691  
299 (2015).
- 300 26. O. Ferlian *et al.*, Invasive earthworms erode soil biodiversity: A meta-analysis. *J. Anim.*  
301 *Ecol.* **87**, 162–172 (2018).
- 302 27. I. M. Lubbers *et al.*, Greenhouse-gas emissions from soils increased by earthworms. *Nat.*  
303 *Clim. Chang.* **3** (2013), pp. 187–194.
- 304 28. H. Hillebrand, On the Generality of the Latitudinal Diversity Gradient. *Am. Nat.* **163**, 192–  
305 211 (2004).
- 306 29. M. L. Rosenzweig, *Species diversity in space and time* (Cambridge University Press,  
307 1995).
- 308 30. J. J. Lennon, J. J. D. Greenwood, J. R. G. Turner, Bird diversity and environmental  
309 gradients in Britain: a test of the species-energy hypothesis. *J. Anim. Ecol.* **69**, 581–598  
310 (2000).
- 311 31. H. Kreft, W. Jetz, Global patterns and determinants of vascular plant diversity. *Proc. Natl.*  
312 *Acad. Sci.* **104**, 5925–5930 (2007).
- 313 32. J. R. G. Turner, C. M. Gatehouse, C. A. Corey, Does Solar Energy Control Organic  
314 Diversity? Butterflies, Moths and the British Climate. *Oikos.* **48**, 195 (1987).
- 315 33. A. Rice *et al.*, The global biogeography of polyploid plants. *Nat. Ecol. Evol.* **3**, 265–273  
316 (2019).
- 317 34. L. Santini *et al.*, Global drivers of population density in terrestrial vertebrates. *Glob. Ecol.*  
318 *Biogeogr.* **27**, 968–979 (2018).
- 319 35. D. J. Currie, J. T. Fritz, Global Patterns of Animal Abundance and Species Energy Use.  
320 *Oikos.* **67**, 56–68 (1993).
- 321 36. D. J. Currie, V. Paquin, Large-scale biogeographical patterns of species richness of trees.  
322 *Nature.* **329**, 326–327 (1987).
- 323 37. H. M. Serna-Chavez, N. Fierer, P. M. Van Bodegom, Global drivers and patterns of  
324 microbial abundance in soil. *Glob. Ecol. Biogeogr.* **22**, 1162–1172 (2013).
- 325 38. K. Ekschmitt, T. Stierhof, J. Dauber, K. Kreimes, V. Wolters, On the quality of soil  
326 biodiversity indicators: abiotic and biotic parameters as predictors of soil faunal richness

- 327 at different spatial scales. *Agric. Ecosyst. Environ.* **98**, 273–283 (2003).
- 328 39. J. Davison *et al.*, Global assessment of arbuscular mycorrhizal fungus diversity reveals  
329 very low endemism. *Science*. **127**, 970–973 (2015).
- 330 40. M. Rutgers *et al.*, Mapping earthworm communities in Europe. *Appl. Soil Ecol.* **97**, 98–  
331 111 (2016).
- 332 41. M. Bahram *et al.*, Structure and function of the global topsoil microbiome. *Nature*. **560**,  
333 233–237 (2018).
- 334 42. G. B. De Deyn, W. H. van der Putten, Linking aboveground and belowground diversity.  
335 *Trends Ecol. Evol.* **20** (2005), pp. 625–633.
- 336 43. N. Fierer, M. S. Strickland, D. Liptzin, M. A. Bradford, C. C. Cleveland, Global patterns in  
337 belowground communities. *Ecol. Lett.* **12** (2009), pp. 1238–1249.
- 338 44. R. R. Dunn *et al.*, Climatic drivers of hemispheric asymmetry in global patterns of ant  
339 species richness. *Ecol. Lett.* **12**, 324–333 (2009).
- 340 45. J. Pietikäinen, M. Pettersson, E. Bååth, Comparison of temperature effects on soil  
341 respiration and bacterial and fungal growth rates. *FEMS Microbiol. Ecol.* **52**, 49–58  
342 (2005).
- 343 46. J. P. Curry, in *Earthworm Ecology* (2004), pp. 91–113.
- 344 47. P. F. Hendrix, P. J. Bohlen, Exotic Earthworm Invasions in North America: Ecological and  
345 Policy Implications. *Bioscience*. **52**, 801–811 (2002).
- 346 48. T. G. Pearce, The Calcium Relations of Selected Lumbricidae. *J. Anim. Ecol.* **41**, 167  
347 (1972).
- 348 49. D. J. Spurgeon, A. M. Keith, O. Schmidt, D. R. Lammertsma, J. H. Faber, Land-use and  
349 land-management change: relationships with earthworm and fungi communities and soil  
350 structural properties. *BMC Ecol.* **13**, 46 (2013).
- 351 50. J. Mathieu, T. J. Davies, Glaciation as an historical filter of below-ground biodiversity. *J.*  
352 *Biogeogr.* **41**, 1204–1214 (2014).
- 353 51. E. K. Cameron *et al.*, Global mismatches in aboveground and belowground biodiversity.  
354 *Conserv. Biol.*, 430 (2019).
- 355 52. J. W. Reynolds, Earthworms of the world. *Glob. Biodivers.* **4**, 11–16 (1994).
- 356 53. K. J. Gaston, T. M. Blackburn, *Pattern and process in macroecology* (2007).
- 357 54. B. Boag, G. W. Yeates, Soil nematode biodiversity in terrestrial ecosystems. *Biodivers.*  
358 *Conserv.* **7**, 617–630 (1998).
- 359 55. D. Song *et al.*, Large-scale patterns of distribution and diversity of terrestrial nematodes.  
360 *Appl. Soil Ecol.* **114**, 161–169 (2017).
- 361 56. M. Maraun, H. Schatz, S. Scheu, Awesome or ordinary? Global diversity patterns of  
362 oribatid mites. *Ecography*. **30**, 209–216 (2007).
- 363 57. T. Decaëns, Macroecological patterns in soil communities. *Glob. Ecol. Biogeogr.* **19**  
364 (2010), pp. 287–302.
- 365 58. A. Shade *et al.*, Macroecology to Unite All Life, Large and Small. *Trends Ecol. Evol.* **33**,  
366 731–744 (2018).
- 367 59. P. Lavelle, E. Lapiéd, Endangered earthworms of Amazonia: an homage to Gilberto  
368 Righi. *Pedobiologia*. **47**, 419–427 (2003).
- 369 60. T. Decaëns *et al.*, DNA barcoding reveals diversity patterns of earthworm communities in  
370 remote tropical forests of French Guiana. *Soil Biol. Biochem.* **92**, 171–183 (2016).
- 371 61. J. W. Spaak *et al.*, Shifts of community composition and population density substantially  
372 affect ecosystem function despite invariant richness. *Ecol. Lett.* **20**, 1315–1324 (2017).
- 373 62. R. Winfree, J. W. Fox, N. M. Williams, J. R. Reilly, D. P. Cariveau, Abundance of common  
374 species, not species richness, drives delivery of a real-world ecosystem service. *Ecol.*  
375 *Lett.* **18**, 626–635 (2015).
- 376 63. K. J. Gaston, R. Fuller, Commonness, population depletion and conservation biology.  
377 *Trends Ecol. Evol.* **23**, 14–19 (2008).

- 378 64. M. Zimmer, G. Kautz, W. Topp, Do woodlice and earthworms interact synergistically in  
379 leaf litter decomposition? *Funct. Ecol.* **19**, 7–16 (2005).
- 380 65. D. C. Coleman, D. A. Crossley, P. F. Hendrix, in *Fundamentals of Soil Ecology* (Elsevier,  
381 2004), pp. 271–298.
- 382 66. L. E. Frelich *et al.*, Trophic cascades, invasive species and body-size hierarchies  
383 interactively modulate climate change responses of ecotonal temperate-boreal forest.  
384 *Philos. Trans. R. Soc. B Biol. Sci.* **367**, 2955–2961 (2012).
- 385 67. S. Meiri, T. Dayan, On the validity of Bergmann’s rule. *J. Biogeogr.* **30**, 331–351 (2003).
- 386 68. L. E. Frelich *et al.*, Earthworm invasion into previously earthworm-free temperate and  
387 boreal forests. *Biol. Invasions.* **8**, 1235–1245 (2006).
- 388 69. P. J. Bohlen *et al.*, Non-Native Invasive Earthworms as Agents of Change in Northern  
389 Temperate Forests. *Front. Ecol. Environ.* **2**, 427 (2004).
- 390 70. N. Eisenhauer, J. Schläpghammerský, P. B. Reich, L. E. Frelich, The wave towards a new  
391 steady state: Effects of earthworm invasion on soil microbial functions. *Biol. Invasions.*  
392 **13**, 2191–2196 (2011).
- 393 71. G. G. Brown, S. W. James, Earthworm biodiversity in São Paulo state, Brazil. *Eur. J. Soil*  
394 *Biol.* **42**, S145–S149 (2006).
- 395 72. M. Drumond *et al.*, Life history, distribution and abundance of the giant earthworm  
396 *Rhinodrilus alatus* RIGHI 1971: conservation and management implications. *Brazilian J.*  
397 *Biol.* **73**, 699–708 (2013).
- 398 73. W. Ulrich, C. Fiera, Original article Environmental correlates of species richness of  
399 European springtails ( Hexapoda : Collembola ). *Acta Oecologica.* **35**, 45–52 (2009).
- 400 74. Intergovernmental Panel on Climate Change, “Climate Change 2014 Synthesis Report  
401 Summary Chapter for Policymakers” (2014), , doi:10.1017/CBO9781107415324.
- 402 75. L. A. Wever, T. J. Lysyk, M. J. Clapperton, The influence of soil moisture and temperature  
403 on the survival, aestivation, growth and development of juvenile *Aporrectodea tuberculata*  
404 (Eisen) (Lumbricidae). *Pedobiologia.* **45**, 121–133 (2001).
- 405 76. J. M. Perreault, J. K. Whalen, Earthworm burrowing in laboratory microcosms as  
406 influenced by soil temperature and moisture. *Pedobiologia.* **50**, 397–403 (2006).
- 407 77. D. K. Hackenberger, B. K. Hackenberger, European Journal of Soil Biology Earthworm  
408 community structure in grassland habitats differentiated by climate type during two  
409 consecutive seasons. *Eur. J. Soil Biol.* **61**, 27–34 (2014).
- 410 78. P. Eggleton, K. Inward, J. Smith, D. T. Jones, E. Sherlock, A six year study of earthworm  
411 (Lumbricidae) populations in pasture woodland in southern England shows their  
412 responses to soil temperature and soil moisture. *Soil Biol. Biochem.* **41**, 1857–1865  
413 (2009).
- 414 79. H. G. Greiner, D. R. Kashian, S. D. Tiegs, Impacts of invasive Asian (*Amyntas*  
415 *hilgendorfi*) and European (*Lumbricus rubellus*) earthworms in a North American  
416 temperate deciduous forest. *Biol. Invasions.* **14**, 2017–2027 (2012).
- 417 80. J. C. Y. Marinissen, F. van den Bosch, Colonization of new habitats by earthworms.  
418 *Oecologia.* **91**, 371–376 (1992).
- 419 81. C. Parmesan, G. Yohe, A globally coherent fingerprint of climate change impacts across  
420 natural systems. *Nature.* **421**, 37–42 (2003).
- 421
- 422

## 423 Supplementary Materials

424 Materials and methods



- 425 Table S1 – S3
- 426 Figures S1 - S4
- 427 References (X – X)
